# Supplementary material for: Non-Authenticity of Spring Barley Genotypes Revealed in Gene Bank Accessions
Source: MDPI journal article supplement (doi:10.3390/plants11223059), 2022-11-11
Supplement: s1 [file s1]

**Table S1.** Accessions of 15 spring barley varieties originating from seven cooperating gene banks, 157 derived single seed progenies (SSPs) and their postulated *MI* powdery mildew resistance genes, and their comparison with 75 SSPs of the same varieties from domestic gene bank studied previously.

| Accession                           | SSP | Gene Bank        | <i>MI</i> Resistance Gene(s) |
|-------------------------------------|-----|------------------|------------------------------|
| <i>Abyssinian 1102</i> <sup>1</sup> | 1   | CZE <sup>2</sup> | <i>none</i>                  |
| <i>Abyssinian 1102</i>              | 2   | CZE              | <i>a8, He2</i>               |
| <i>Abyssinian 1102</i>              | 3   | CZE              | <i>a8, He2</i>               |
| <i>Abyssinian 1102</i>              | 4   | CZE              | <i>a7, g</i>                 |
| <i>Abyssinian 1102</i>              | 5   | CZE              | <i>a8, He2</i>               |
| <i>Abyssinian 1102</i>              | 1   | GBR              | <i>mlo</i>                   |
| <i>Abyssinian 1102</i>              | 2   | GBR              | <i>mlo</i>                   |
| <i>Abyssinian 1102</i>              | 3   | GBR              | <i>mlo</i>                   |
| <i>Abyssinian 1102</i>              | 4   | GBR              | <i>mlo</i>                   |
| <i>Abyssinian 1102</i>              | 5   | GBR              | <i>mlo</i>                   |
| <i>Abyssinian 1102 (L94)</i>        | 1   | USA              | <i>mlo</i>                   |
| <i>Abyssinian 1102 (L94)</i>        | 2   | USA              | <i>mlo</i>                   |
| <i>Abyssinian 1102 (L94)</i>        | 3   | USA              | <i>mlo</i>                   |
| <i>Abyssinian 1102 (L94)</i>        | 4   | USA              | <i>mlo</i>                   |
| <i>Abyssinian 1102 (L94)</i>        | 5   | USA              | <i>mlo</i>                   |
| <i>Asse</i>                         | 1   | CZE              | <i>ra, u</i>                 |
| <i>Asse</i>                         | 2   | CZE              | <i>ra, u</i>                 |
| <i>Asse</i>                         | 3   | CZE              | <i>ra, u</i>                 |
| <i>Asse</i>                         | 4   | CZE              | <i>ra, u</i>                 |
| <i>Asse</i>                         | 5   | CZE              | <i>ra, u</i>                 |
| <i>Asse</i>                         | 1   | USA              | <i>a8</i>                    |
| <i>Asse</i>                         | 2   | USA              | <i>a8</i>                    |
| <i>Asse</i>                         | 3   | USA              | <i>a8</i>                    |
| <i>Asse</i>                         | 4   | USA              | <i>a8</i>                    |
| <i>Asse</i>                         | 5   | USA              | <i>a8</i>                    |
| <i>Black Hull-less</i>              | 1   | CZE              | <i>n</i>                     |
| <i>Black Hull-less</i>              | 2   | CZE              | <i>n</i>                     |
| <i>Black Hull-less</i>              | 3   | CZE              | <i>n</i>                     |
| <i>Black Hull-less</i>              | 4   | CZE              | <i>n</i>                     |
| <i>Black Hull-less</i>              | 5   | CZE              | <i>n</i>                     |
| <i>Black Hull-less</i>              | 1   | USA              | <i>n</i>                     |
| <i>Black Hull-less</i>              | 2   | USA              | <i>n</i>                     |
| <i>Diamant</i>                      | 1   | CZE              | <i>mlo</i>                   |
| <i>Diamant</i>                      | 2   | CZE              | <i>mlo</i>                   |
| <i>Diamant</i>                      | 3   | CZE              | <i>a8</i>                    |
| <i>Diamant</i>                      | 4   | CZE              | <i>a7, La</i>                |
| <i>Diamant</i>                      | 5   | CZE              | <i>a8, He2</i>               |

---

|                           |   |     |                |
|---------------------------|---|-----|----------------|
| Diamant                   | 1 | GBR | <i>a8, He2</i> |
| Diamant                   | 2 | GBR | <i>a8, He2</i> |
| Diamant                   | 3 | GBR | <i>a8, He2</i> |
| Diamant                   | 4 | GBR | <i>a8, He2</i> |
| Diamant                   | 5 | GBR | <i>a8, He2</i> |
| Diamant                   | 1 | SVK | <i>mlo</i>     |
| Diamant                   | 2 | SVK | <i>mlo</i>     |
| Diamant                   | 3 | SVK | <i>a6, La</i>  |
| Diamant                   | 4 | SVK | <i>a8, He2</i> |
| Diamant                   | 5 | SVK | <i>mlo</i>     |
| <i>Donaria Ackermanns</i> | 1 | CZE | <i>Ch, He2</i> |
| <i>Donaria Ackermanns</i> | 2 | CZE | <i>Ch, He2</i> |
| <i>Donaria Ackermanns</i> | 3 | CZE | <i>Ch, He2</i> |
| <i>Donaria Ackermanns</i> | 4 | CZE | <i>Ch, He2</i> |
| <i>Donaria Ackermanns</i> | 5 | CZE | <i>Ch, He2</i> |
| Donaria Ackermanns        | 1 | DEU | <i>a8, He2</i> |
| Donaria Ackermanns        | 2 | DEU | <i>a8, He2</i> |
| Donaria Ackermanns        | 3 | DEU | <i>a8, He2</i> |
| Donaria Ackermanns        | 4 | DEU | <i>a8, He2</i> |
| Donaria Ackermanns        | 5 | DEU | <i>a8, He2</i> |
| Donaria Ackermanns        | 1 | GBR | <i>a8, u</i>   |
| Donaria Ackermanns        | 2 | GBR | <i>a8, He2</i> |
| Donaria Ackermanns        | 3 | GBR | <i>a8, He2</i> |
| Donaria Ackermanns        | 4 | GBR | <i>a8, He2</i> |
| Donaria Ackermanns        | 5 | GBR | <i>a8, He2</i> |
| Donaria Ackermanns        | 1 | USA | <i>a8, He2</i> |
| Donaria Ackermanns        | 2 | USA | <i>a8, He2</i> |
| Donaria Ackermanns        | 3 | USA | <i>a8, He2</i> |
| Donaria Ackermanns        | 4 | USA | <i>a8, He2</i> |
| Donaria Ackermanns        | 5 | USA | <i>a8, He2</i> |
| <i>Emir</i>               | 1 | CZE | <i>none</i>    |
| <i>Emir</i>               | 2 | CZE | <i>none</i>    |
| <i>Emir</i>               | 3 | CZE | <i>a8</i>      |
| <i>Emir</i>               | 4 | CZE | <i>a8</i>      |
| <i>Emir</i>               | 5 | CZE | <i>a8</i>      |
| Emir                      | 1 | DEU | <i>a12</i>     |
| Emir                      | 2 | DEU | <i>a12</i>     |
| Emir                      | 3 | DEU | <i>a12</i>     |
| Emir                      | 4 | DEU | <i>a12</i>     |
| Emir                      | 5 | DEU | <i>a12</i>     |
| Emir                      | 1 | GBR | <i>a12</i>     |
| Emir                      | 2 | GBR | <i>a12</i>     |

---

|               |   |     |                  |
|---------------|---|-----|------------------|
| Emir          | 3 | GBR | <i>a12</i>       |
| Emir          | 4 | GBR | <i>a12</i>       |
| Emir          | 5 | GBR | <i>a12</i>       |
| Emir          | 1 | USA | <i>a12</i>       |
| Emir          | 2 | USA | <i>a12</i>       |
| Emir          | 3 | USA | <i>a12</i>       |
| Emir          | 4 | USA | <i>a12</i>       |
| Emir          | 5 | USA | <i>a12</i>       |
| <i>Falcon</i> | 1 | CZE | <i>Ch</i>        |
| <i>Falcon</i> | 2 | CZE | <i>Ch</i>        |
| <i>Falcon</i> | 3 | CZE | <i>Ch</i>        |
| <i>Falcon</i> | 4 | CZE | <i>Ch</i>        |
| <i>Falcon</i> | 5 | CZE | <i>Ch</i>        |
| Falcon        | 1 | DEU | <i>Ch</i>        |
| Falcon        | 2 | DEU | <i>Ch</i>        |
| Falcon        | 3 | DEU | <i>Ch</i>        |
| Falcon        | 4 | DEU | <i>Ch</i>        |
| Falcon        | 5 | DEU | <i>Ch</i>        |
| <i>Gerda</i>  | 1 | CZE | <i>g</i>         |
| <i>Gerda</i>  | 2 | CZE | <i>a8</i>        |
| <i>Gerda</i>  | 3 | CZE | <i>a7, k1, g</i> |
| <i>Gerda</i>  | 4 | CZE | <i>a7, k1, g</i> |
| <i>Gerda</i>  | 5 | CZE | <i>a7, k1, g</i> |
| Gerda         | 1 | GBR | <i>a6, g</i>     |
| Gerda         | 2 | GBR | <i>a6, g</i>     |
| Gerda         | 3 | GBR | <i>a6</i>        |
| Gerda         | 4 | GBR | <i>a6, g</i>     |
| Gerda         | 5 | GBR | <i>a6, g</i>     |
| Gerda         | 1 | POL | <i>a8, He2</i>   |
| Gerda         | 2 | POL | <i>a8, He2</i>   |
| Gerda         | 3 | POL | <i>a8</i>        |
| Gerda         | 4 | POL | <i>a8, He2</i>   |
| Gerda         | 5 | POL | <i>a8, He2</i>   |
| Gerda         | 1 | USA | <i>a6, g</i>     |
| Gerda         | 2 | USA | <i>a6, g</i>     |
| Gerda         | 3 | USA | <i>a6, g</i>     |
| Gerda         | 4 | USA | <i>a6, g</i>     |
| Gerda         | 5 | USA | <i>a6, g</i>     |
| <i>Hana</i>   | 1 | CZE | <i>a8, He2</i>   |
| <i>Hana</i>   | 2 | CZE | <i>a8, He2</i>   |
| <i>Hana</i>   | 3 | CZE | <i>a8, He2</i>   |
| <i>Hana</i>   | 4 | CZE | <i>a8, He2</i>   |

---

|                  |   |     |                |
|------------------|---|-----|----------------|
| <i>Hana</i>      | 5 | CZE | <i>g, He2</i>  |
| Hana             | 1 | USA | <i>g, He2</i>  |
| Hana             | 2 | USA | <i>g, He2</i>  |
| Hana             | 3 | USA | <i>a8, He2</i> |
| Hana             | 4 | USA | <i>g, He2</i>  |
| Hana             | 5 | USA | <i>g, He2</i>  |
| <i>Hanna</i>     | 1 | CZE | <i>g</i>       |
| <i>Hanna</i>     | 2 | CZE | <i>g</i>       |
| <i>Hanna</i>     | 3 | CZE | <i>g</i>       |
| <i>Hanna</i>     | 4 | CZE | <i>g</i>       |
| <i>Hanna</i>     | 5 | CZE | <i>g</i>       |
| Hanna            | 1 | DEU | <i>g</i>       |
| Hanna            | 2 | DEU | <i>g</i>       |
| Hanna            | 3 | DEU | <i>g</i>       |
| Hanna            | 4 | DEU | <i>g</i>       |
| Hanna            | 5 | DEU | <i>g</i>       |
| Hanna            | 1 | HUN | <i>Ch, He2</i> |
| Hanna            | 2 | HUN | <i>Ch, He2</i> |
| Hanna            | 3 | HUN | <i>Ch, He2</i> |
| Hanna            | 4 | HUN | <i>Ch, He2</i> |
| Hanna            | 5 | HUN | <i>Ch, He2</i> |
| Hanna            | 1 | POL | <i>Ch, He2</i> |
| Hanna            | 2 | POL | <i>a8</i>      |
| Hanna            | 3 | POL | <i>a8</i>      |
| Hanna            | 4 | POL | <i>a8</i>      |
| Hanna            | 5 | POL | <i>a8</i>      |
| <i>Manchuria</i> | 1 | CZE | <i>none</i>    |
| <i>Manchuria</i> | 2 | CZE | <i>none</i>    |
| <i>Manchuria</i> | 3 | CZE | <i>none</i>    |
| <i>Manchuria</i> | 4 | CZE | <i>none</i>    |
| <i>Manchuria</i> | 5 | CZE | <i>none</i>    |
| Manchuria        | 1 | USA | <i>none</i>    |
| Manchuria        | 2 | USA | <i>none</i>    |
| Manchuria        | 3 | USA | <i>none</i>    |
| Manchuria        | 4 | USA | <i>none</i>    |
| Manchuria        | 5 | USA | <i>none</i>    |
| <i>Rupee</i>     | 1 | CZE | <i>u</i>       |
| <i>Rupee</i>     | 2 | CZE | <i>u</i>       |
| <i>Rupee</i>     | 3 | CZE | <i>u</i>       |
| <i>Rupee</i>     | 4 | CZE | <i>u</i>       |
| <i>Rupee</i>     | 5 | CZE | <i>u</i>       |
| Rupee            | 1 | DEU | <i>a8</i>      |

---

|                         |   |     |                   |
|-------------------------|---|-----|-------------------|
| Rupee                   | 2 | DEU | <i>a13</i>        |
| Rupee                   | 3 | DEU | <i>a13</i>        |
| Rupee                   | 4 | DEU | <i>a13</i>        |
| Rupee                   | 5 | DEU | <i>a13</i>        |
| Rupee                   | 1 | GBR | <i>Ch</i>         |
| Rupee                   | 2 | GBR | <i>Ch</i>         |
| Rupee                   | 3 | GBR | <i>a13</i>        |
| Rupee                   | 4 | GBR | <i>a13</i>        |
| Rupee                   | 5 | GBR | <i>a8</i>         |
| Rupee                   | 1 | USA | <i>a13</i>        |
| Rupee                   | 2 | USA | <i>a13</i>        |
| Rupee                   | 3 | USA | <i>a13</i>        |
| Rupee                   | 4 | USA | <i>a13</i>        |
| Rupee                   | 5 | USA | <i>a13</i>        |
| Schwarzenberg Gerste 21 | 1 | CZE | <i>a6, g</i>      |
| Schwarzenberg Gerste 21 | 2 | CZE | <i>a6, g</i>      |
| Schwarzenberg Gerste 21 | 3 | CZE | <i>a6, g</i>      |
| Schwarzenberg Gerste 21 | 4 | CZE | <i>a6, g</i>      |
| Schwarzenberg Gerste 21 | 5 | CZE | <i>a6, g</i>      |
| Schwarzenberg Gerste 21 | 1 | DEU | <i>none</i>       |
| Schwarzenberg Gerste 21 | 2 | DEU | <i>none</i>       |
| Schwarzenberg Gerste 21 | 3 | DEU | <i>none</i>       |
| Schwarzenberg Gerste 21 | 4 | DEU | <i>none</i>       |
| Schwarzenberg Gerste 21 | 5 | DEU | <i>none</i>       |
| Schwarzenberg Gerste 21 | 1 | POL | <i>a8</i>         |
| Schwarzenberg Gerste 21 | 2 | POL | <i>a8</i>         |
| Schwarzenberg Gerste 21 | 3 | POL | <i>a8</i>         |
| Schwarzenberg Gerste 21 | 4 | POL | <i>a8</i>         |
| Schwarzenberg Gerste 21 | 5 | POL | <i>a8</i>         |
| Trumpf                  | 1 | CZE | <i>a9</i>         |
| Trumpf                  | 2 | CZE | <i>a13, g</i>     |
| Trumpf                  | 3 | CZE | <i>a13, g</i>     |
| Trumpf                  | 4 | CZE | <i>a9</i>         |
| Trumpf                  | 5 | CZE | <i>a7, k1, La</i> |
| Trumpf                  | 1 | DEU | <i>a7</i>         |
| Trumpf                  | 2 | DEU | <i>a7</i>         |
| Trumpf                  | 3 | DEU | <i>a7</i>         |
| Trumpf                  | 4 | DEU | <i>a7</i>         |
| Trumpf                  | 5 | DEU | <i>a7</i>         |
| Trumpf                  | 1 | POL | <i>a8</i>         |
| Trumpf                  | 2 | POL | <i>a8</i>         |
| Trumpf                  | 3 | POL | <i>a8</i>         |

---

|                  |   |     |                    |
|------------------|---|-----|--------------------|
| Trumpf           | 4 | POL | <i>a8</i>          |
| Trumpf           | 5 | POL | <i>a8</i>          |
| Trumpf           | 1 | USA | <i>a7</i>          |
| Trumpf           | 2 | USA | <i>a7</i>          |
| Trumpf           | 3 | USA | <i>a8, He2</i>     |
| Trumpf           | 4 | USA | <i>a8, He2</i>     |
| Trumpf           | 5 | USA | <i>a8, He2</i>     |
| <i>Vega Abed</i> | 1 | CZE | <i>a13</i>         |
| <i>Vega Abed</i> | 2 | CZE | <i>a13</i>         |
| <i>Vega Abed</i> | 3 | CZE | <i>a13</i>         |
| <i>Vega Abed</i> | 4 | CZE | <i>a13</i>         |
| <i>Vega Abed</i> | 5 | CZE | <i>a13</i>         |
| Vega Abed        | 1 | DEU | <i>a8, He2, La</i> |
| Vega Abed        | 2 | DEU | <i>a8</i>          |
| Vega Abed        | 3 | DEU | <i>a8</i>          |
| Vega Abed        | 4 | DEU | <i>a8</i>          |
| Vega Abed        | 5 | DEU | <i>a8</i>          |
| Vega Abed        | 1 | POL | <i>a8</i>          |
| Vega Abed        | 2 | POL | <i>a8</i>          |
| Vega Abed        | 3 | POL | <i>a8</i>          |
| Vega Abed        | 4 | POL | <i>a8, La</i>      |
| Vega Abed        | 5 | POL | <i>a8, He2, La</i> |
| Vega Abed        | 1 | SWE | <i>a8</i>          |
| Vega Abed        | 2 | SWE | <i>a8, He2, La</i> |
| Vega Abed        | 3 | SWE | <i>a8</i>          |
| Vega Abed        | 4 | SWE | <i>a8</i>          |
| Vega Abed        | 5 | SWE | <i>a8, La</i>      |

---

<sup>1</sup> Accessions of 15 identical varieties from domestic gene bank (CZE) and their 75 SSPs written in italics were studied previously [3]. <sup>2</sup> Country of gene bank: CZE – Czech Republic, DEU – Germany, GBR – United Kingdom, HUN – Hungary, POL – Poland, SVK – Slovakia, SWE – Sweden, USA – United States.
